# Supplementary material for: Isothermal and non-isothermal transport properties of diluted fullerene binary and ternary aromatic solvent mixtures
Source: Royal Society of Chemistry journal article supplement (doi:10.1039/d4cp01504e), 2024-01-01
Supplement: d4cp01504e1.xlsx [file d4cp01504e1.xlsx]

## Sheet: Hoja1
	PURE SOLVENTS - THERMOPHYSICAL PROPERTIES
	Density (kg/m3)	MN	Tol	oXyl	mXyl	pXyl
		1019.86	862.205	875.36	859.912	856.698
	THERMAL EXPANSION	MN		Tol		oXyl		mXyl		pXyl
		temperature	density	temperature	density	temperature	density	temperature	density	temperature	density
		23	1021.36	23	864.069	23.997	876.209	23.996	860.773	23.996	857.569
		24	1020.61	24	863.138	24.502	875.794	24.502	860.357	24.5	857.148
		25	1019.86	25	862.205	25.003	875.375	25.002	859.93	25.002	856.715
		26	1019.12	26	861.273	25.503	874.954	25.503	859.5	25.503	856.281
		27	1018.37	27	860.34	26.003	874.533	26.003	859.07	26.003	855.846
		Slope	Therm. Exp.	Slope	Therm. Exp.	Slope	Therm. Exp.	Slope	Therm. Exp.	Slope	Therm. Exp.
		-0.748	0.000733432	-0.9323	0.0010813	-0.836217	0.000955268	-0.850034	0.000988492	-0.859667	0.00100345
	REFRACTIVE INDEX	Solvent	Raw measurements (Abbemat MW)							Cauchy fitting			Refractive Index Values
			435.8	480	514.5	546.1	589.3	632.8	656.3	A	B	C	405.5	532	632.8	935
		MN	1.65138	1.63433	1.62533	1.61821	1.61123	1.60574	1.6036	1.57774	8.80842e-15	9.82669e-28	1.66747	1.62113	1.60587	1.58911
		Tol	1.5149	1.5064	1.50168	1.49788	1.49404	1.49097	1.48984	1.47354	6.26752e-15	3.02067e-28	1.52274	1.49946	1.49108	1.4811
		oXyl	1.5231	1.51474	1.51003	1.5063	1.50251	1.49945	1.49837	1.48222	6.21173e-15	2.95291e-28	1.53083	1.50786	1.49958	1.48972
		mXyl	1.51503	1.50677	1.50211	1.49843	1.49469	1.49167	1.49061	1.47471	6.10507e-15	2.95432e-28	1.52268	1.49997	1.4918	1.48208
		pXyl	1.51369	1.50549	1.50083	1.49713	1.49337	1.49033	1.48928	1.4731	6.27415e-15	2.73426e-28	1.52128	1.49868	1.49047	1.48063
	SOLUTAL CONTRAST FACTORS - NANOFLUIDS
		C60 mass fraction / Refractive index 632,8 nm
	Solvent	0	0.00025	0.0005	0.001	0.0015	0.0018	0.002	0.0025	dn/dc
	MN	1.60973	1.6098	1.60987	1.61001	1.61017	1.61024	1.6103	1.61042	0.280589
	Tol	1.49141	1.49149	1.49156	1.49167	1.49186	-	1.492	1.49212	0.287154
	oXyl	1.50008	1.50017	1.50024	1.50037	1.50055	1.50064	1.50064	1.50078	0.28129
	mXyl	1.49208	1.49214	1.49222	1.49234	1.49249	1.49257	1.49264	1.49277	0.279176
	pXyl	1.49059	1.49069	1.49069	1.49087	1.49101	1.49111	1.49117	1.49131	0.289933
	SOLVENT SOLVENT MIXTURES
	MN | Tol
		Raw measurements (Abbemat MW)								Cauchy fitting			Refractive Index Values
		c1	436.1	480.2	513	546.9	589.3	633	655	A	B	C	405.5	532	632.8	935
		0.48005	1.57613	1.56393	1.55733	1.55208	1.54687	1.54271	1.54117	1.52059	7.43838e-15	5.90808e-28	1.58768	1.55425	1.54285	1.52987
		0.489852	1.57748	1.56519	1.55854	1.55326	1.54801	1.54383	1.54227	1.52158	7.47117e-15	5.97259e-28	1.58911	1.55544	1.54397	1.53091
		0.49999	1.57876	1.56638	1.5597	1.55437	1.54909	1.54489	1.54332	1.52251	7.51226e-15	6.02092e-28	1.59047	1.55657	1.54503	1.53189
		0.509937	1.58007	1.56762	1.56089	1.55553	1.55023	1.54601	1.54443	1.52358	7.5073e-15	6.11683e-28	1.59186	1.55774	1.54615	1.53297
		0.519958	1.58157	1.56903	1.56226	1.55687	1.55153	1.54728	1.5457	1.52474	7.53935e-15	6.18157e-28	1.59345	1.55909	1.54742	1.53417
	MN | oXyl
		Raw measurements (Abbemat MW)								Cauchy fitting			Refractive Index Values
		c1	436.1	480.2	513	546.9	589.3	633	655	A	B	C	405.5	532	632.8	935
		0.479942	1.58055	1.56838	1.5618	1.55656	1.55137	1.54724	1.5457	1.52522	7.39382e-15	5.9151e-28	1.59206	1.55873	1.54737	1.53445
		0.489725	1.5818	1.56957	1.56295	1.55769	1.55247	1.54832	1.54677	1.52621	7.41509e-15	5.97023e-28	1.59339	1.55986	1.54845	1.53547
		0.499255	1.58315	1.57082	1.56416	1.55885	1.5536	1.54941	1.54785	1.52716	7.45851e-15	6.03422e-28	1.59483	1.56104	1.54954	1.53648
		0.509934	1.58445	1.57203	1.56532	1.55998	1.5547	1.5505	1.54893	1.5282	7.44954e-15	6.14244e-28	1.59622	1.56219	1.55063	1.53752
		0.520091	1.58575	1.57325	1.56649	1.56112	1.5558	1.55157	1.54999	1.52913	7.49178e-15	6.19616e-28	1.59761	1.56334	1.55171	1.53851
	MN | mXyl
		Raw measurements (Abbemat MW)								Cauchy fitting			Refractive Index Values
		c1	436.1	480.2	513	546.9	589.3	633	655	A	B	C	405.5	532	632.8	935
		0.480012	1.57581	1.56376	1.55723	1.55204	1.54689	1.54279	1.54126	1.52091	7.35823e-15	5.82912e-28	1.58722	1.55419	1.54292	1.53009
		0.489956	1.57715	1.56502	1.55845	1.55322	1.54805	1.54392	1.54238	1.52195	7.37481e-15	5.90617e-28	1.58865	1.55538	1.54405	1.53116
		0.499981	1.57852	1.56628	1.55968	1.55441	1.54921	1.54506	1.54351	1.52302	7.38168e-15	6.00133e-28	1.5901	1.55659	1.54519	1.53224
		0.50997	1.5799	1.56758	1.56092	1.55563	1.55038	1.54621	1.54465	1.52403	7.42068e-15	6.0579e-28	1.59157	1.55781	1.54634	1.53331
		0.519962	1.58125	1.56885	1.56215	1.55682	1.55154	1.54735	1.54579	1.52508	7.43871e-15	6.1327e-28	1.593	1.55902	1.54748	1.53439
	MN | pXyl
		Raw measurements (Abbemat MW)								Cauchy fitting			Refractive Index Values
		c1	436.1	480.2	513	546.9	589.3	633	655	A	B	C	405.5	532	632.8	935
		0.480031	1.57469	1.56263	1.55612	1.55091	1.54576	1.54167	1.54013	1.51976	7.36769e-15	5.82015e-28	1.5861	1.55306	1.54179	1.52895
		0.489993	1.57605	1.56391	1.55735	1.55212	1.54695	1.54282	1.54128	1.52083	7.38657e-15	5.89159e-28	1.58754	1.55428	1.54295	1.53005
		0.499952	1.57737	1.56515	1.55854	1.55327	1.54807	1.54393	1.54237	1.52182	7.41476e-15	5.95352e-28	1.58894	1.55545	1.54405	1.53108
		0.509991	1.57863	1.56633	1.55969	1.5544	1.54917	1.54499	1.54343	1.52283	7.42365e-15	6.0312e-28	1.59028	1.55658	1.54513	1.53211
		0.519929	1.58018	1.56779	1.5611	1.55577	1.5505	1.5463	1.54474	1.52402	7.44938e-15	6.10974e-28	1.59192	1.55797	1.54644	1.53334
	oXyl | Tol
			coXyl	cTol	Mean Dens. (kg/m3)	Beta 25ºC
		1	0.480039	0.519961	868.041	0.0148786
		2	0.489678	0.510322	868.158
		3	0.49991	0.50009	868.301
		4	0.510049	0.489951	868.441
		5	0.519934	0.480066	868.546
		Raw measurements (Abbemat MW)								Cauchy fitting			Refractive Index Values
		c1	436.1	480.2	513	546.9	589.3	633	655	A	B	C	405.5	532	632.8	935
		0.480039	1.51859	1.51015	1.50545	1.50167	1.49786	1.4948	1.49368	1.47747	6.23554e-15	2.99452e-28	1.52647	1.50324	1.49491	1.48499
		0.489678	1.51867	1.51022	1.50553	1.50175	1.49793	1.49488	1.49376	1.47757	6.22812e-15	3.00208e-28	1.52655	1.50332	1.49499	1.48508
		0.49991	1.51876	1.5103	1.50562	1.50184	1.49802	1.49497	1.49386	1.47771	6.1978e-15	3.03839e-28	1.52664	1.5034	1.49508	1.4852
		0.510049	1.51886	1.5104	1.50571	1.50193	1.49812	1.49507	1.49395	1.47784	6.17665e-15	3.06651e-28	1.52675	1.50349	1.49518	1.48531
		0.519934	1.51891	1.51045	1.50576	1.50199	1.49818	1.49513	1.49402	1.47791	6.17561e-15	3.06275e-28	1.5268	1.50355	1.49524	1.48538
	Tol |mXyl
			cTol	cmXyl	Mean Dens. (kg/m3)	Mass Exp.
		1	0.480046	0.519954	860.577	0.0030598
		2	0.489432	0.510568	860.598
		3	0.50003	0.49997	860.615
		4	0.510187	0.489813	860.645
		5	0.520238	0.479762	860.687
	Tol |pXyl
			cTol	cpXyl	Mean Dens. (kg/m3)	Mass Exp.
		1	0.479987	0.520013	859.175	0.00635584
		2	0.489931	0.510069	859.23
		3	0.499989	0.500011	859.296
		4	0.510111	0.489889	859.337
		5	0.52003	0.47997	859.395
	oXyl |mXyl
			coXyl	cmXyl	Mean Dens. (kg/m3)	Mass Exp.
		1	0.480078	0.519922	867.202	0.017823
		2	0.489942	0.510058	867.347
		3	0.499997	0.500003	867.51
		4	0.510176	0.489824	867.658
		5	0.520046	0.479954	867.821
		Raw measurements (Abbemat MW)								Cauchy fitting			Refractive Index Values
		c1	436.1	480.2	513	546.9	589.3	633	655	A	B	C	405.5	532	632.8	935
		0.480133	1.5188	1.51043	1.50579	1.50205	1.49828	1.49527	1.49416	1.47824	6.10166e-15	3.04359e-28	1.52661	1.5036	1.49538	1.48562
		0.489749	1.51886	1.51049	1.50585	1.50212	1.49835	1.49534	1.49423	1.47834	6.0872e-15	3.06107e-28	1.52668	1.50367	1.49545	1.4857
		0.4999	1.51895	1.51058	1.50593	1.5022	1.49842	1.49541	1.49431	1.47838	6.10116e-15	3.04975e-28	1.52676	1.50374	1.49552	1.48576
		0.509796	1.51902	1.51065	1.50599	1.50229	1.49848	1.49546	1.49436	1.47836	6.14415e-15	2.99954e-28	1.52682	1.50381	1.49558	1.48578
		0.519957	1.51909	1.51073	1.50607	1.50234	1.49856	1.49554	1.49444	1.47846	6.13214e-15	3.01359e-28	1.5269	1.50389	1.49565	1.48587
	oXyl | pXyl
			coXyl	cpXyl	Mean Dens. (kg/m3)	Mass Exp.
		1	0.479862	0.520138	865.563	0.0211264
		2	0.48999	0.51001	865.779
		3	0.499992	0.500008	865.938
		4	0.509979	0.490021	866.131
		5	0.52005	0.47995	866.305
		Raw measurements (Abbemat MW)								Cauchy fitting			Fitted data
		c1	436.1	480.2	513	546.9	589.3	633	655	A	B	C	405.5	532	632.8	935
		0.48002	1.51802	1.50966	1.50501	1.50128	1.49751	1.49451	1.49341	1.47754	6.06861e-15	3.08088e-28	1.52584	1.50283	1.49462	1.48489
		0.489928	1.51814	1.50977	1.50512	1.50139	1.49762	1.49461	1.49351	1.47762	6.08142e-15	3.07271e-28	1.52596	1.50294	1.49472	1.48497
		0.499958	1.51825	1.50989	1.50524	1.50151	1.49774	1.49472	1.49363	1.47773	6.08431e-15	3.06548e-28	1.52607	1.50306	1.49484	1.48509
		0.509912	1.51836	1.51	1.50534	1.50161	1.49784	1.49482	1.49373	1.4778	6.09948e-15	3.05256e-28	1.52618	1.50316	1.49493	1.48517
		0.519972	1.51845	1.51009	1.50544	1.5017	1.49793	1.49491	1.49381	1.47785	6.11958e-15	3.02508e-28	1.52626	1.50325	1.49502	1.48525
	mXyl |pXyl
			cmXyl	cpXyl	Mean Dens. (kg/m3)	Mass Exp.
		1	0.480157	0.519843	858.257	0.00371205
		2	0.489822	0.510178	858.289
		3	0.500003	0.499997	858.323
		4	0.51004	0.48996	858.351
		5	0.519632	0.480368	858.384
		Raw measurements (Abbemat MW)								Cauchy fitting			Fitted data
		c1	436.1	480.2	513	546.9	589.3	633	655	A	B	C	405.5	532	632.8	935
		0.480042	1.51427	1.50595	1.50132	1.49761	1.49387	1.49087	1.48978	1.47398	6.04319e-15	3.05781e-28	1.52205	1.49915	1.49098	1.4813
		0.489882	1.51428	1.50597	1.50134	1.49763	1.49389	1.49088	1.48979	1.47393	6.07925e-15	3.01362e-28	1.52205	1.49917	1.49099	1.48128
		0.49991	1.5143	1.50599	1.50136	1.49766	1.49391	1.4909	1.48981	1.47396	6.07585e-15	3.01647e-28	1.52207	1.4992	1.49102	1.48131
		0.52	1.51435	1.50604	1.50141	1.49771	1.49396	1.49095	1.48987	1.47402	6.07482e-15	3.01596e-28	1.52212	1.49925	1.49107	1.48136
